# Supplementary material for: In-Hospital Survival and Neurological Recovery Among Patients Requiring Renal Replacement Therapy in Post–Cardiac Arrest Period
Source: PubMed Central journal article supplement — Kidney Int Rep. 2019 Feb 13;4(5):674–8. doi: 10.1016/j.ekir.2019.02.004 (PMC6506695; doi:10.1016/j.ekir.2019.02.004), 2019-02-13

**Supplementary Figure 1.** Patient selection for the prospective renal replacement therapy (RRT) cohort after cardiac arrest (CA)

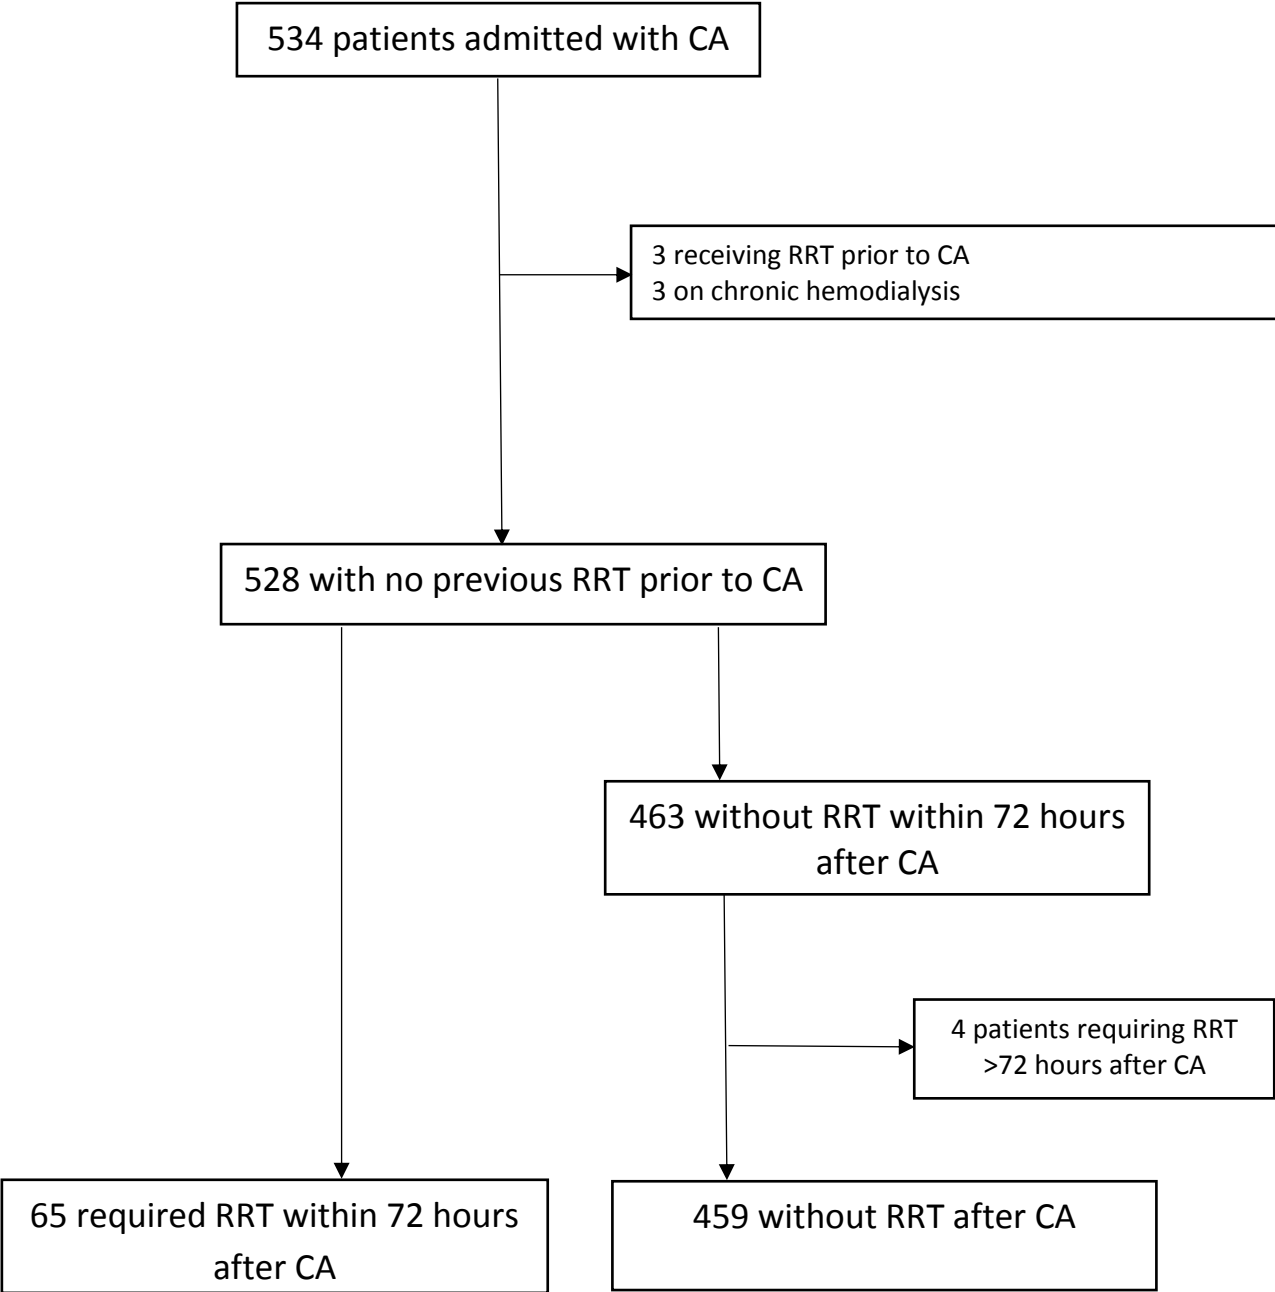

Supplement: mmc1.pdf [file mmc1.pdf]
