# Supplementary material for: In-Hospital Survival and Neurological Recovery Among Patients Requiring Renal Replacement Therapy in Post–Cardiac Arrest Period
Source: PubMed Central journal article supplement — Kidney Int Rep. 2019 Feb 13;4(5):674–8. doi: 10.1016/j.ekir.2019.02.004 (PMC6506695; doi:10.1016/j.ekir.2019.02.004), 2019-02-13
Supplement: mmc2.pdf [file mmc2.pdf]

**Supplementary Table 1. Comparing various clinical characteristics of survivors and non-survivors among RRT patients (n=65)**

| Characteristics, n (%)              | Survivors<br>n=19 (29.2%) | Non-survivors<br>n=46 (70.8%) | <i>p value</i> |
|-------------------------------------|---------------------------|-------------------------------|----------------|
| <b>Age, mean ± SD</b>               | 61.9 ± 17.3               | 58.9± 15.7                    | 0.48           |
| <b>Men</b>                          | 11 (57.9)                 | 34 (73.9)                     | 0.20           |
| <b>CCI, median (IQR)</b>            | 4 (2-5)                   | 4 (2-6)                       | 0.70           |
| <b>Pre-arrest comorbidities</b>     |                           |                               |                |
| Myocardial Infarction               | 2 (10.5)                  | 2 (4.4)                       | 0.57           |
| Heart Failure                       | 4 (21.1)                  | 16 (34.8)                     | 0.28           |
| Hypertension                        | 13 (68.4)                 | 28 (60.9)                     | 0.57           |
| Renal Disease                       | 7 (36.8)                  | 17 (37.0)                     | 0.99           |
| NIDDM                               | 6 (31.6)                  | 8 (17.4)                      | 0.32           |
| Liver Disease                       | 0 (0)                     | 5 (10.9)                      | 0.31           |
| Cerebrovascular Disease             | 1 (5.3)                   | 3 (6.5)                       | 1.00           |
| PVD                                 | 2 (10.5)                  | 6 (13.0)                      | 1.00           |
| Obesity (BMI>30 m/kg <sup>2</sup> ) | 2 (10.5)                  | 6 (13.0)                      | 1.00           |
| Dementia                            | 1 (5.3)                   | 2 (4.4)                       | 1.00           |
| <b>Smoking status</b>               |                           |                               | 0.20           |
| Non-smoker                          | 11 (57.9)                 | 24 (57.1)                     |                |
| Former-smoker                       | 7 (36.8)                  | 9 (21.4)                      |                |
| Current-smoker                      | 1 (5.3)                   | 9 (21.4)                      |                |
| <b>Pre-arrest CPC</b>               |                           |                               | 0.60           |
| - CPC 1                             | 14 (73.7)                 | 29 (63.0)                     |                |

|                                                                |                 |                 |      |
|----------------------------------------------------------------|-----------------|-----------------|------|
| - CPC 2                                                        | 4 (21.1)        | 11 (23.9)       |      |
| - CPC 3                                                        | 1 (5.3)         | 6 (13.0)        |      |
| <b>in-hospital arrests</b>                                     | 12 (63.2)       | 23 (50.0)       | 0.33 |
| <b>Witnessed</b>                                               | 16 (84.2)       | 37 (80.4)       | 1.00 |
| <b>CPR</b>                                                     |                 |                 | 0.09 |
| -No CPR                                                        | 0 (0)           | 10 (21.7)       |      |
| -Yes, by a bystander                                           | 3 (15.8)        | 6 (13.0)        |      |
| -Yes, with medical personnel                                   | 16 (84.2)       | 30 (65.2)       |      |
| <b>Defibrillation use</b>                                      | 7 (38.9)        | 17 (37.8)       | 0.94 |
| <b>Initial Rhythm</b>                                          |                 |                 | 0.69 |
| - VT/VF/AED Advised Shock                                      | 8 (42.1)        | 12 (30.8)       |      |
| - PEA                                                          | 7 (36.8)        | 18 (46.2)       |      |
| - Asystole                                                     | 4 (21.1)        | 9 (23.1)        |      |
| <b>ROSC, mean <math>\pm</math> SD</b>                          | 16.9 $\pm$ 15.7 | 27.5 $\pm$ 29.5 | 0.21 |
| <b>Temperature Management</b>                                  | 13 (68.4)       | 40 (87.0)       | 0.16 |
| <b>Dialysis requirements at discharge (for survivors only)</b> | 7 (36.8)        | --              | --   |

SD: standard deviation  
 BMI: Body Mass Index  
 IQR: Interquartile Range  
 NIDDM: Non-insulin-dependent diabetes mellitus  
 PVD: Peripheral vascular disease  
 CPC: Cerebral performance score  
 CPR: Cardiopulmonary resuscitation  
 VT/VF: Ventricular tachycardia / ventricular fibrillation  
 AED: Automated external defibrillators  
 PEA: Pulseless electrical activity  
 ROSC: Return of Spontaneous Circulation
