# Supplementary material for: In-Hospital Survival and Neurological Recovery Among Patients Requiring Renal Replacement Therapy in Post–Cardiac Arrest Period
Source: PubMed Central journal article supplement — Kidney Int Rep. 2019 Feb 13;4(5):674–8. doi: 10.1016/j.ekir.2019.02.004 (PMC6506695; doi:10.1016/j.ekir.2019.02.004), 2019-02-13
Supplement: mmc3.pdf [file mmc3.pdf]

## Supplemental section 1

Therapeutic hypothermia with a goal temperature of 32-34°C was started immediately after the return of spontaneous circulation with ice packs and ice-cold infusions and was maintained for 24 hours using a surface cooling device (Arctic Sun Temperature Management System<sup>®</sup>, Medivance, Louisville, CO) or intravascular device (Thermogard XP Temperature Management System<sup>®</sup>, Zoll, Chelmsford, MA). Shivering was assessed using the bedside shivering assessment scale and managed with a standard anti-shivering protocol.<sup>20,21</sup> After 24 hours, patients were actively rewarmed, using the same device, to a core temperature of 37°C at a rate of 0.1°C per hour and maintained at normothermia for another 24 hours.

1. Badjatia N, Strongilis E, Gordon E, et al. Metabolic impact of shivering during therapeutic temperature modulation: The Bedside Shivering Assessment Scale. *Stroke* 2008; 39:3242-3247.
2. Choi HA, Ko SB, Presciutti M, et al. Prevention of shivering during therapeutic temperature modulation: the Columbia anti-shivering protocol. *Neurocritical Care* 2011;14:389-394.
